# Supplementary material
Source: Springer Nature journal article supplement (https://www.springermedizin.de/resource/supplementary/13256_2011_2079_MOESM1_ESM.pdf/9648976)

A

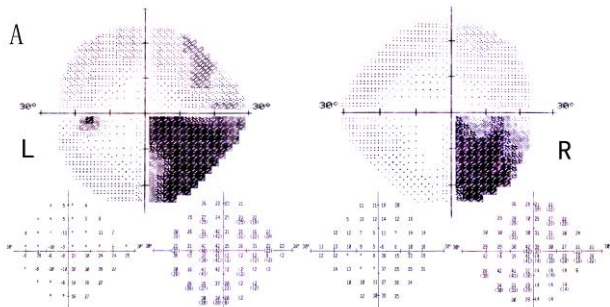

B

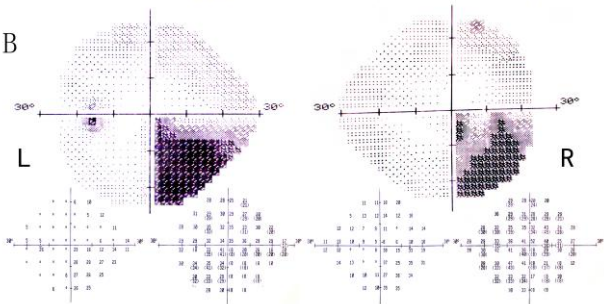

Supplement: MOESM1 [file 9648976]
